# Supplementary material
Source: Royal Society of Chemistry journal article supplement (doi:10.1039/d6ea00052e)
Supplement: d6ea00052e1.pdf [file d6ea00052e1.pdf]

1 SUPPORTING INFORMATION

2 for

3 **A one-step, scalable thermospray method for synthesis of multi-**  
4 **component particles mimicking atmospheric particulate matter**

5 Xi-En Zhang<sup>1,2</sup>, Zigu Chen<sup>1</sup>, Peijie Zou<sup>1,4</sup>, Qian Liu<sup>1,3\*</sup>, Guibin Jiang<sup>1,2,3</sup>

6 *<sup>1</sup> State Key Laboratory of Environmental Chemistry and Toxicology, Research Center for*  
7 *Eco-Environmental Sciences, Beijing 100085, China*

8 *<sup>2</sup> School of Environment, Hangzhou Institute for Advanced Study, University of Chinese*  
9 *Academy of Sciences, Hangzhou 310024, China*

10 *<sup>3</sup> University of Chinese Academy of Sciences, Beijing 100190, China*

11 *<sup>4</sup> Institute of NBC Defense, PLA, Beijing 102205, China*

12 Email: [qianliu@rcees.ac.cn](mailto:qianliu@rcees.ac.cn)

13

14 **Supporting tables**

15 **Table S1.** Chemical compositions of PM<sub>2.5</sub> collected in Beijing region reported in the literature  
 16 [1-15].

| Ref. No. | Chemical composition (%) |          |          |          |         |           |       |
|----------|--------------------------|----------|----------|----------|---------|-----------|-------|
|          | Nitrate                  | Sulphate | Chloride | Ammonium | EC      | OC        | Metal |
| 1        | 8.96                     | 12.58    | 1.78     | 5.41     | 7.57    | 18.70     | 6.43  |
| 2        | 6.26                     | 9.69     | 2.51     | 4.55     | -       | -         | 5.37  |
| 3        | 8.5                      | 13.3     | 1.9      | 6.2      | 7       | 29        | 9.00  |
| 4        | 8.37                     | 10.07    | 1.05     | 5.11     | 3.70    | 12.52     | 2.30  |
| 5        | 17.5                     | 25.1     | 5.6      | 15.1     | -       | 37.3      | -     |
| 6        | 12-17                    | 12-13    | -        | 8-11     | 3-5     | 36-39     | -     |
| 7        | 5.9-16.4                 | 5.6-8.1  | 2.3-4.3  | 4.7-9.2  | 7.3-9.8 | 52.7-72.7 | -     |
| 8        | 20                       | 20       | -        | 8        |         | 45        | 8.00  |
| 9        | 30.6                     | 16.9     | 11       | 22.7     | 15      | 20        | 0.40  |
| 10       | 23                       | 27       | -        | 12       | 2       | 18        | -     |
| 11       | 20                       | 20       | 3.5      | 7        | 1.8     | 18.6-25.5 | -     |
| 12       | 11.02                    | 7.18     | 2.81     | 8.55     | -       | -         | 4.84  |
| 13       | 17.88                    | 11.34    | 6.05     | 8.31     | -       | -         | -     |
| 14       | 22-26                    | 14-31    | -        | -        | -       |           | -     |
| 15       | 16                       | 10.9     | 10.9     | 4.9      | 4.3     | 42.8      | 10.5  |

17 EC: element carbon; OC: organic carbon; metal: light elements (Na, Mg, Al, K, Ca) and  
 18 heavy metals (Fe, Cu, Zn, Pb).

19

20 **Table S2.** Weighing records of multi-component compounds for spray-drying experiment.

| Components                                      | Reagent Information |                |            | Mass of each reagent in groups (g) |         |         |
|-------------------------------------------------|---------------------|----------------|------------|------------------------------------|---------|---------|
|                                                 | catalog             | specifications | purity     | Group 1                            | Group 2 | Group 3 |
| NaNO <sub>3</sub>                               | 10019918            |                |            | 0.0853                             | 0.0839  | 0.0858  |
| KNO <sub>3</sub>                                | 10017218            |                |            | 0.1032                             | 0.1022  | 0.1001  |
| NH <sub>4</sub> Cl                              | 10001518            |                |            | 0.0679                             | 0.0681  | 0.0674  |
| (NH <sub>4</sub> ) <sub>2</sub> SO <sub>4</sub> | 10002918            |                |            | 0.2000                             | 0.2016  | 0.2003  |
| Ca (NO <sub>3</sub> ) <sub>2</sub>              | 80029018            | 500 g          |            | 0.1001                             | 0.1009  | 0.1026  |
| MgSO <sub>4</sub>                               | 10013016            |                |            | 0.1417                             | 0.1452  | 0.1422  |
| Al (NO <sub>3</sub> ) <sub>3</sub>              | 80003617            |                | Analytical | 0.0455                             | 0.0465  | 0.0459  |
| Pb (NO <sub>3</sub> ) <sub>2</sub>              | 80073618            |                | grade or   | 0.0097                             | 0.0104  | 0.0113  |
| ZnSO <sub>4</sub>                               | 10024028            |                | above      | 0.0162                             | 0.0147  | 0.0148  |
| Black carbon                                    | 633100              | 1000 g         |            | 0.0662                             | 0.0654  | 0.0669  |
| SiO <sub>2</sub>                                | 637238              | 100 g          |            | 0.0048                             | 0.0045  | 0.0049  |
| Fe <sub>3</sub> O <sub>4</sub>                  | 310069              | 100 g          |            | 0.0094                             | 0.0079  | 0.0082  |
| CuO                                             | 544868              | 50 g           |            | 0.0080                             | 0.0076  | 0.0087  |
| Lauric acid                                     | 8053331000          | 10 g           |            | 0.1153                             | 0.1122  | 0.1125  |
| Terephthalic acid                               | 8007621000          | 100 g          |            | 0.1094                             | 0.1104  | 0.1119  |

21

22 **Table S3.** The detailed percentages of viable cells exposed to PM<sub>2.5</sub> concentrations (10, 20, 40,  
23 50, 80, 100, 160, and 200 µg/mL).

| Concentration (ng/mL) | Cell growth inhibition rate (%) |       |
|-----------------------|---------------------------------|-------|
|                       | 24 h                            | 48 h  |
| 10                    | 15.68                           | 15.37 |
| 20                    | 24.04                           | 23.56 |
| 40                    | 27.41                           | 26.87 |
| 50                    | 30.18                           | 29.57 |
| 80                    | 32.99                           | 32.33 |
| 100                   | 31.56                           | 30.93 |
| 160                   | 28.88                           | 28.31 |
| 200                   | 29.12                           | 28.54 |

24

25 **Table S4.** The standard curve results of chloride, nitrate and sulfate.

| Concentration<br>( $\mu\text{g/mL}$ ) | Retention<br>time(min) | Peak area | Peak height | Amount ( $\mu\text{g/mL}$ ) |
|---------------------------------------|------------------------|-----------|-------------|-----------------------------|
| 2.5                                   | 4.857                  | 0.0744    | 0.587       | 2.821                       |
| 5.0                                   | 4.857                  | 0.1457    | 1.188       | 4.980                       |
| 10.0                                  | 4.857                  | 0.3094    | 2.538       | 9.937                       |
| 20.0                                  | 4.860                  | 0.6395    | 5.229       | 19.937                      |
| 25.0                                  | 4.857                  | 0.8057    | 6.554       | 24.973                      |
| 50.0                                  | 4.857                  | 1.6160    | 13.068      | 49.516                      |
| 100.0                                 | 4.860                  | 3.2910    | 26.486      | 100.253                     |

26

| Concentration<br>( $\mu\text{g/mL}$ ) | Retention<br>time(min) | Peak area | Peak height | Amount ( $\mu\text{g/mL}$ ) |
|---------------------------------------|------------------------|-----------|-------------|-----------------------------|
| 2.5                                   | 9.283                  | 0.2265    | 0.927       | 2.622                       |
| 5.0                                   | 9.283                  | 0.4542    | 1.921       | 5.016                       |
| 10.0                                  | 9.273                  | 0.9334    | 3.987       | 10.051                      |
| 20.0                                  | 9.260                  | 1.8843    | 8.010       | 20.045                      |
| 25.0                                  | 9.253                  | 2.3603    | 9.961       | 25.048                      |
| 50.0                                  | 9.223                  | 4.6982    | 19.281      | 49.619                      |
| 100.0                                 | 9.170                  | 9.5079    | 36.721      | 100.167                     |

27

| Concentration<br>( $\mu\text{g/mL}$ ) | Retention<br>time(min) | Peak area | Peak height | Amount ( $\mu\text{g/mL}$ ) |
|---------------------------------------|------------------------|-----------|-------------|-----------------------------|
| 2.5                                   | 7.440                  | 0.5962    | 2.311       | 2.197                       |
| 5.0                                   | 7.440                  | 1.2001    | 4.863       | 4.709                       |
| 10.0                                  | 7.440                  | 2.4676    | 10.520      | 9.980                       |
| 20.0                                  | 7.437                  | 4.9264    | 22.266      | 20.206                      |
| 25.0                                  | 7.433                  | 6.1314    | 28.364      | 25.217                      |
| 50.0                                  | 7.433                  | 12.0751   | 59.092      | 49.936                      |
| 100.0                                 | 7.440                  | 24.1000   | 118.656     | 99.944                      |

28

## 29 Supporting figures

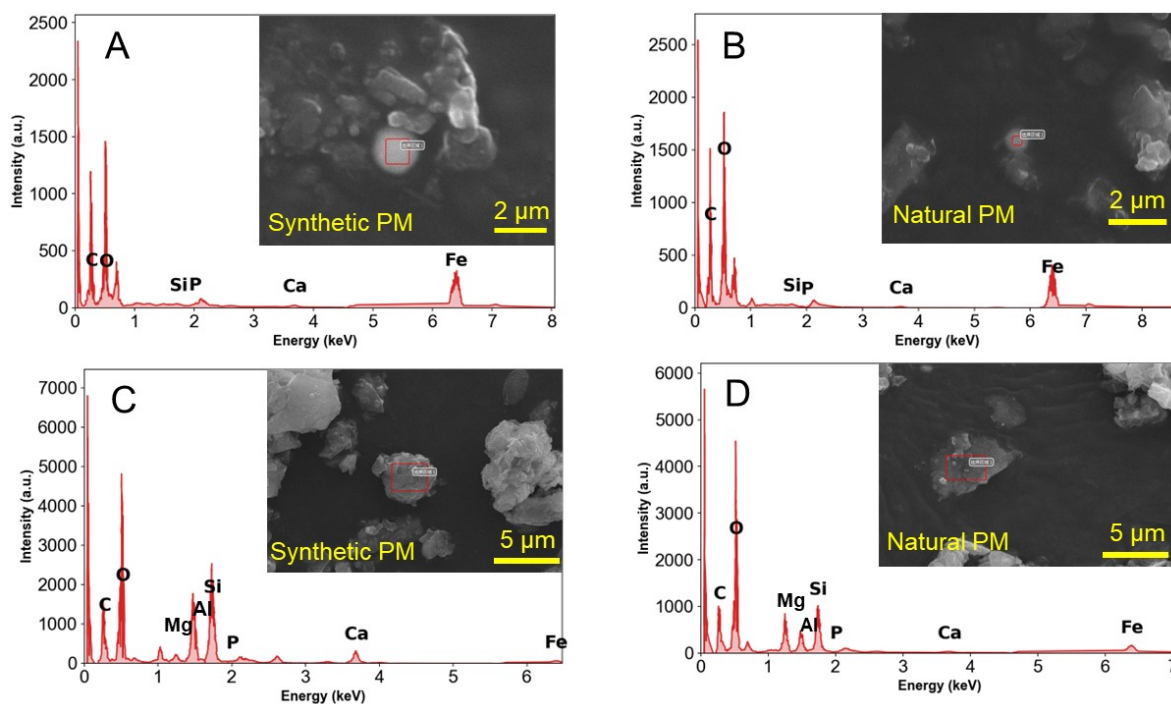

30

31 **Figure S1. Particle morphology and elemental composition of iron oxides and silica oxides**  
32 **in synthetic PM<sub>2.5</sub> and real PM<sub>2.5</sub> samples characterized by SEM-EDX. (A) and (C)**  
33 **represent iron oxide particles and silica particles in the synthesized PM<sub>2.5</sub> samples, respectively.**  
34 **(B) and (D) represent iron oxide particles and silica particles in the real PM<sub>2.5</sub> samples,**  
35 **respectively.**

36

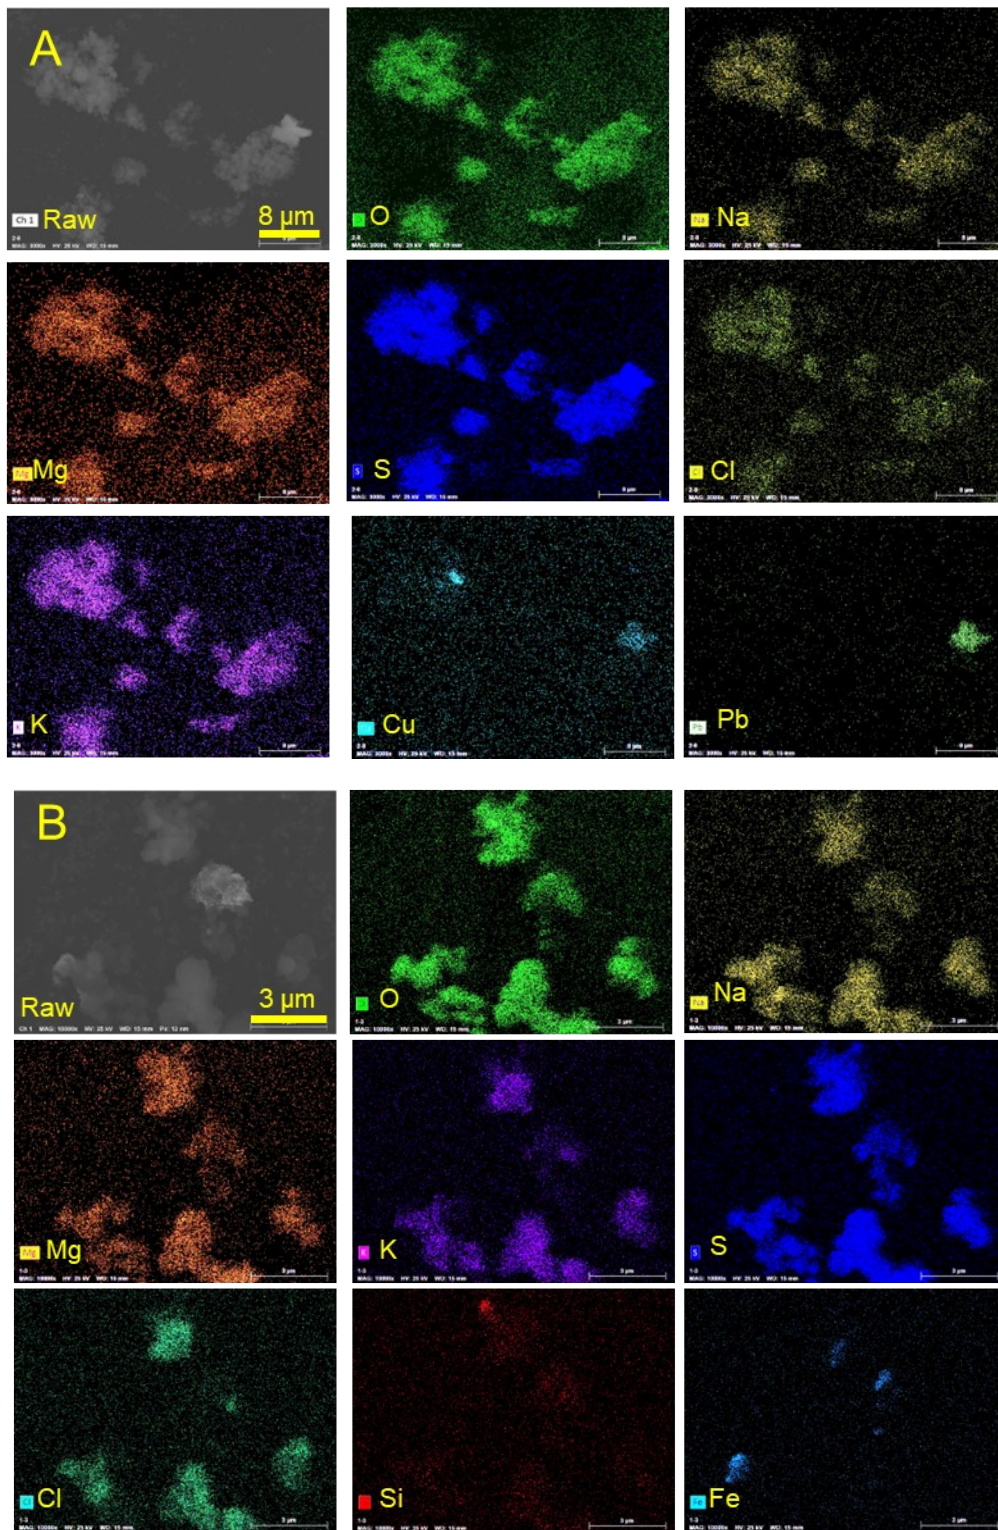

37

38

39 **Figure S2. Homogeneous and heterogeneous elemental distributions of different elements**  
 40 **in typical SEM images of two kinds of PM<sub>2.5</sub> samples. (A) Synthetic PM<sub>2.5</sub> samples. (B) Real**  
 41 **PM<sub>2.5</sub> samples.**

42

### 43 References for SI:

- 44 1. Kebin H, Fumo Y, Yongliang M, Qiang Z, Xiaohong Y, Chak K. Chanb, Steven C, Tai  
45 C, Patricia M. The characteristics of PM<sub>2.5</sub> in Beijing, China. *Atmospheric Environment*  
46 2001, 35: 4959–4970.
- 47 2. Yele S, Guoshun Z, Aohan T, Ying W, Zhishen G. Chemical Characteristics of PM<sub>2.5</sub>  
48 and PM<sub>10</sub> in Haze-Fog Episodes in Beijing. *Environmental Science & Technology*  
49 2006, 40: 3148-3155.
- 50 3. Gao J, Wang K, Wang Y, Liu S, Zhu C, Hao J, Liu H, Hua S, Tian H. Temporal-spatial  
51 characteristics and source apportionment of PM<sub>2.5</sub> as well as its associated chemical  
52 species in the Beijing-Tianjin-Hebei region of China. *Environmental Pollution* 2018,  
53 233: 714-724.
- 54 4. Harrison RM. Airborne particulate matter. *Philosophical Transactions of the Royal*  
55 *Society A: Mathematical, Physical and Engineering Sciences* 2020, 378(2183).
- 56 5. Hu R, Xu Q, Wang S, Hua Y, Bhattarai N, Jiang J, Song Y, Daellenbach KR, Qi L,  
57 Prevot ASH, *et al.* Chemical characteristics and sources of water-soluble organic  
58 aerosol in southwest suburb of Beijing. *Journal of Environmental Sciences* 2020, 95:  
59 99-110.
- 60 6. Huang R-J, Yang L, Shen J, Yuan W, Gong Y, Guo J, Cao W, Duan J, Ni H, Zhu C, *et*  
61 *al.* Water-Insoluble Organics Dominate Brown Carbon in Wintertime Urban Aerosol  
62 of China: Chemical Characteristics and Optical Properties. *Environmental Science &*  
63 *Technology* 2020, 54(13): 7836-7847.
- 64 7. Li S, Zhang F, Jin X, Sun Y, Wu H, Xie C, Chen L, Liu J, Wu T, Jiang S, *et al.*  
65 Characterizing the ratio of nitrate to sulfate in ambient fine particles of urban Beijing  
66 during 2018–2019. *Atmospheric Environment* 2020, 237.
- 67 8. Lim S, Yang X, Lee M, Li G, Gao Y, Shang X, Zhang K, Czimczik CI, Xu X, Bae M-S,  
68 *et al.* Fossil-driven secondary inorganic PM<sub>2.5</sub> enhancement in the North China Plain:  
69 Evidence from carbon and nitrogen isotopes. *Environmental Pollution* 2020, 266.
- 70 9. Quan J, Tie X, Zhang Q, Liu Q, Li X, Gao Y, Zhao D. Characteristics of heavy aerosol  
71 pollution during the 2012–2013 winter in Beijing, China. *Atmospheric Environment*  
72 2014, 88: 83-89.
- 73 10. Shang D, Peng J, Guo S, Wu Z, Hu M. Secondary aerosol formation in winter haze over  
74 the Beijing-Tianjin-Hebei Region, China. *Frontiers of Environmental Science &*  
75 *Engineering* 2020, 15(2).
- 76 11. Xie Y, Wang G, Wang X, Chen J, Chen Y, Tang G, Wang L, Ge S, Xue G, Wang Y, *et*

- 77 *al.* Nitrate-dominated PM<sub>2.5</sub> and elevation of particle pH observed in urban Beijing  
78 during the winter of 2017. *Atmospheric Chemistry and Physics* 2020, 20(8): 5019-5033.
- 79 12. Yang F, Tan J, Zhao Q, Du Z, He K, Ma Y, Duan F, Chen G, Zhao Q. Characteristics of  
80 PM<sub>2.5</sub> speciation in representative megacities and across China. *Atmospheric Chemistry  
81 and Physics* 2011, 11(11): 5207-5219.
- 82 13. Yang S, Duan F, Ma Y, Li H, Wang J, Du Z, Xu Y, Zhang T, Zhu L, Huang T, *et al.*  
83 Characteristics and seasonal variations of high-molecular-weight oligomers in urban  
84 haze aerosols. *Science of The Total Environment* 2020, 746.
- 85 14. Zhang R, Jing J, Tao J, Hsu SC, Wang G, Cao J, Lee CSL, Zhu L, Chen Z, Zhao Y, *et al.*  
86 Chemical characterization and source apportionment of PM<sub>2.5</sub> in Beijing: seasonal  
87 perspective. *Atmospheric Chemistry and Physics* 2013, 13(14): 7053-7074.
- 88 15. Zhang X, Zhang K, Liu H, Lv W, Aikawa M, Liu B, Wang J. Pollution sources of  
89 atmospheric fine particles and secondary aerosol characteristics in Beijing. *Journal of  
90 Environmental Sciences* 2020, 95: 91-98.
- 91
